# Supplementary material for: VISIONET: intuitive visualisation of overlapping transcription factor networks, with applications in cardiogenic gene discovery
Source: Springer Nature journal article supplement (doi:10.1186/s12859-015-0578-0), 2015-04-30
Supplement: 12859_2015_578_MOESM1_ESM.pdf [file 12859_2015_578_MOESM1_ESM.pdf]

# **VISIONET: Intuitive visualisation of overlapping transcription factor networks, with applications in cardiogenic gene discovery**

Hieu T. Nim<sup>1,2\*</sup>, Milena B. Furtado<sup>2</sup>, Mauro W. Costa<sup>2</sup>, Nadia A. Rosenthal<sup>1,2,3</sup>, Hiroaki Kitano<sup>1,2,4,5</sup> and Sarah E. Boyd<sup>1,2\*</sup>

<sup>1</sup>Systems Biology Institute (SBI) Australia, Monash University, VIC 3800, Australia

<sup>2</sup>Australian Regenerative Medicine Institute, Monash University, VIC 3800, Australia

<sup>3</sup>National Heart and Lung Institute, Imperial College London, W12 0NN UK

<sup>4</sup>Sony Computer Science Laboratories, Inc., Higashigotanda, Shinagawa, Tokyo, Japan

<sup>5</sup>Okinawa Institute of Science and Technology, Onna, Onna-son, Kunigami, Okinawa, Japan

\*Corresponding to: hieu.nim@monash.edu; sarah.boyd@sbiaustralia.org

## **SUPPLEMENTARY METHODS AND MATERIALS**

### **Text S1. Materials and Methods**

#### **Animal ethics statement**

All mice were kept in a full BL6-J background, housed at Monash Animal Services and experiments conformed with requirements under the ethics application MARP-2011-175 (Monash University).

#### **Sample preparation, microarray and qPCR**

The mouse cardiac and tail fibroblast cell preparation, microarray and RT-qPCR assays were performed as previously described [1]. The mouse *Aldh1a2* primers for RT-qPCR experiments were: for 5'-TGCAGGCTGGGCTGATAAAA; rev 5'-GTGAACATCAGCAGGGGGAA. Transcription factor networks for *Gata4* and *Tbx20* were constructed from ChIP-Seq datasets available from NCBI GEO with accession numbers GSM558904 and GSM734426, respectively. The microarray data for the cardiac fibroblasts and tail fibroblasts are available from NCBI GEO with accession number GSE50531 [1]. The raw ChIP-Seq datasets were downloaded from NCBI in \*.BED format, and then annotated using the CisGenome package [2] to produce an output file in \*.COD format. Raw microarray datasets were downloaded from NCBI in \*.TXT format, and then converted to \*.SOFT format by selecting the appropriate columns using Microsoft Excel.

**Table S2. List of 13 genes (>16-fold different between heart and tail fibroblasts) that are co-regulated by *Tbx20* and *Gata4*.**

| <b>Gene Names</b> | <b>LogFC(Heart/Tail)</b> |
|-------------------|--------------------------|
| Aldh1a2           | 7.904636667              |
| Heyl              | 6.3092139                |
| Tgm2              | 5.544541333              |
| Pde1a             | 5.356449333              |
| Nr1h4             | 5.2692862                |
| Tnnt2             | 4.803914333              |
| Kif26b            | 4.619946067              |
| Ch25h             | 4.576112867              |
| Chst11            | 4.551474767              |
| Ptprb             | 4.461602167              |
| Mtus2             | 4.126453833              |
| Actc1             | -4.990979567             |
| Pcp4l1            | -6.8415073               |

## REFERENCES

1. Furtado MB, Costa MW, Pranoto EA, Salimova E, Pinto AR, Lam NT, Park A, Snider P, Chandran A, Harvey RP *et al*: **Cardiogenic genes expressed in cardiac fibroblasts contribute to heart development and repair.** *Circulation research* 2014, **114**(9):1422-1434.
2. Ji H, Jiang H, Ma W, Johnson DS, Myers RM, Wong WH: **An integrated software system for analyzing ChIP-chip and ChIP-seq data.** *Nature Biotechnology* 2008, **26**(11):1293-1300.
